# Supplementary material for: Phenotypical and Functional Analysis of Intraepithelial Lymphocytes from Small Intestine of Mice in Oral Tolerance
Source: Hindawi journal article supplement (doi:10.1155/2012/208054), 2012-01-01

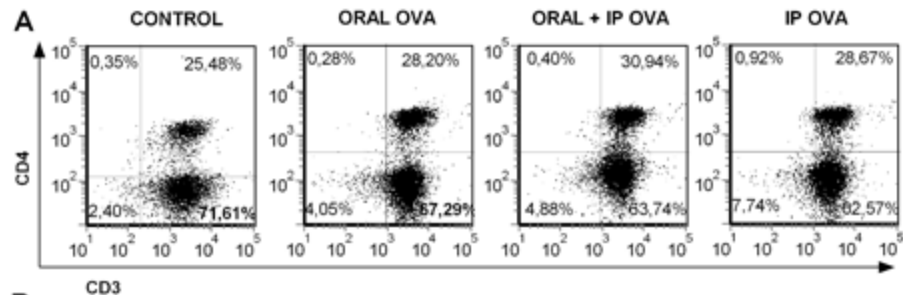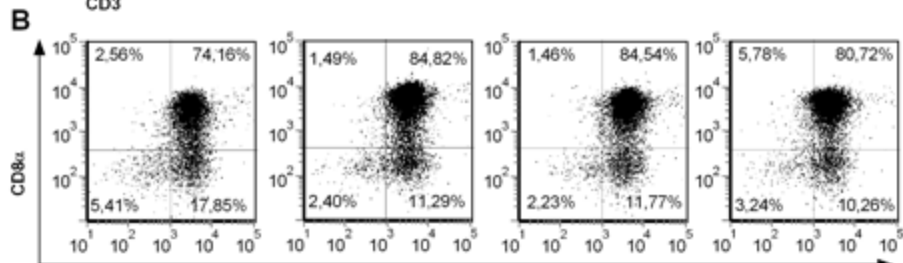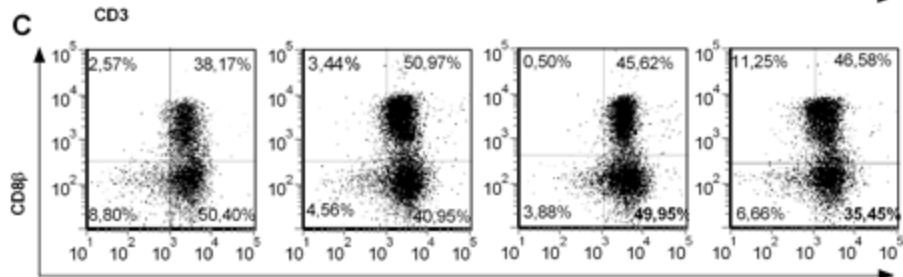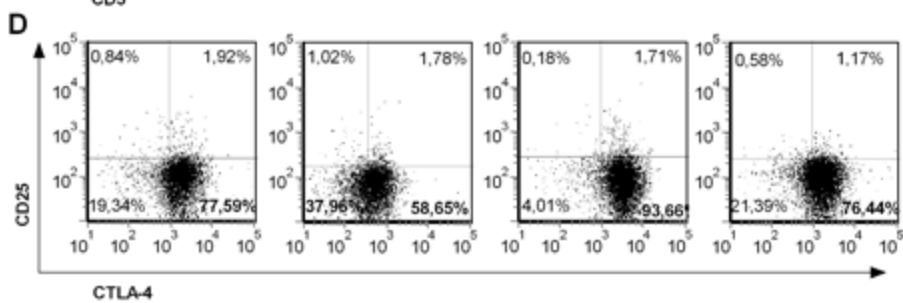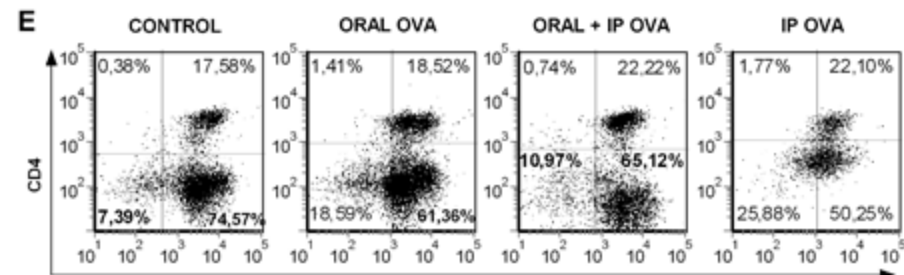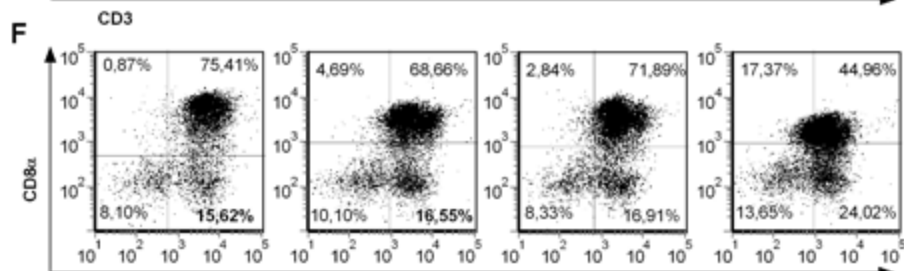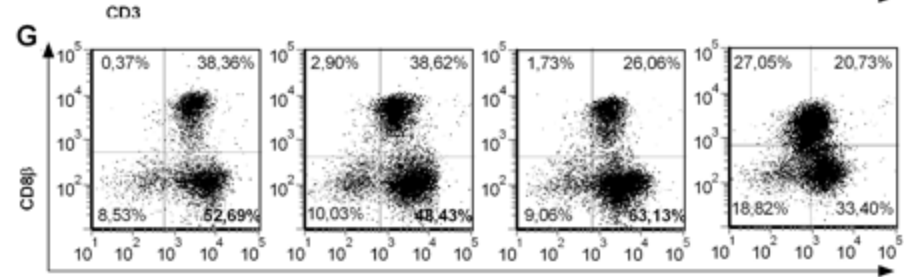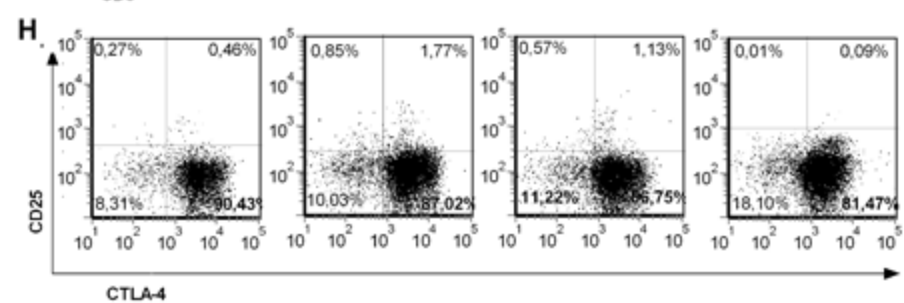

Supplement: f1 [file 208054.f1.pdf]
